# Supplementary material
Source: PubMed Central journal article supplement (PMC5161087)
Supplement: supp_kww145_kww145TamimiWebMaterialFinal.pdf [file supp_kww145_kww145TamimiWebMaterialFinal.pdf]

Web Table 1. Breast Cancer Risk Factors for Postmenopausal Women in the Nurses' Health Study at Start of Follow-up<sup>a</sup> (N=112,951) including % missing person-time

| Breast Cancer Risk Factors                           | Frequency, %           | % Missing |
|------------------------------------------------------|------------------------|-----------|
| <b><i>Non-modifiable risk factors</i></b>            |                        |           |
| Age, years (SD)                                      | 47.5(6.9) <sup>b</sup> | 0.0       |
| Age at menarche                                      |                        | 0.8       |
| - ≤ 12 years                                         | 48.6                   |           |
| - 13 years                                           | 30.7                   |           |
| - ≥ 14 years                                         | 20.8                   |           |
| BMI at 18 categories                                 |                        | 0.1       |
| - <19.0                                              | 17.0                   |           |
| - 19.0 -20.9                                         | 33.6                   |           |
| - 21.0- 22.9                                         | 29.4                   |           |
| - ≥23.0                                              | 20.0                   |           |
| Height ≥64 inches                                    | 64.7                   | 0.1       |
| Parity/Age at 1st birth                              |                        | 2.2       |
| - Nulliparous                                        | 6.0                    |           |
| - ≥ 1 child & age at first birth <25 years           | 38.2                   |           |
| - 1-4 children & age at first birth ≥ 25 & <30 years | 30.9                   |           |
| - 1-4 children & age at first birth ≥ 30 years       | 9.4                    |           |
| - >4 children                                        | 15.4                   |           |
| Benign breast disease history                        | 42.0                   | 0.0       |
| Family history of breast cancer                      | 12.5                   | 0.0       |
| Age of menopause                                     |                        | 4.1       |
| -<45 years                                           | 28.2                   |           |
| -45-<52 years                                        | 44.1                   |           |
| -52+ years                                           | 27.7                   |           |

**Modifiable risk factors**

|                                                           |      |      |
|-----------------------------------------------------------|------|------|
| Total Breast Feeding Duration (months) Among Parous Women |      | 13.3 |
| - None                                                    | 40.6 |      |
| - Ever                                                    | 59.5 |      |
| Weight change since age 18                                |      | 11.7 |
| - weight loss to < 2.0 kg weight gain                     | 17.7 |      |
| - 2.1-5.0 kg weight gain                                  | 10.2 |      |
| - 5.1-10.0 kg weight gain                                 | 17.1 |      |
| - 10.1-20.0 kg weight gain                                | 28.6 |      |
| - 20.1+ kg weight gain                                    | 26.4 |      |
| Menopausal hormone therapy use                            |      | 17.1 |
| - Never and past user                                     | 66.1 |      |
| - Current user                                            | 33.9 |      |
| Alcohol consumption                                       |      | 10.9 |
| - None                                                    | 23.8 |      |
| - <5.0 gm/day                                             | 42.6 |      |
| - 5.0-15.0 gm/day                                         | 21.6 |      |
| - 15.0+ gm/day                                            | 12.0 |      |
| Physical Activity METs/wk, cumulative average             |      | 11.8 |
| - 1 <sup>st</sup> quartile                                | 24.2 |      |
| - 2 <sup>nd</sup> quartile                                | 24.9 |      |
| - 3 <sup>rd</sup> quartile                                | 25.5 |      |
| - 4 <sup>th</sup> quartile                                | 25.4 |      |

---

Abbreviations: Physical Activity METs/wk: metabolic equivalent task hours per week

Web Table 2. Population Attributable Risk (PAR) Percent for 4-variable, 3-variable, and 2-variable Combinations of Risk Factors in Postmenopausal Women, Nurses' Health Study 1980-2010

| <b>Risk Factors</b>                                              | <b><u>Invasive Breast Cancer</u></b> |               | <b><u>ER-positive</u></b> |               | <b><u>ER-negative</u></b> |               |
|------------------------------------------------------------------|--------------------------------------|---------------|---------------------------|---------------|---------------------------|---------------|
|                                                                  | <b><u>PAR%</u></b>                   | <b>95% CI</b> | <b><u>PAR%</u></b>        | <b>95% CI</b> | <b><u>PAR%</u></b>        | <b>95% CI</b> |
|                                                                  | 8,421                                |               | 5,376                     |               | 1,270                     |               |
|                                                                  | 2,424,778                            |               | 2,421,194                 |               | 2,416,662                 |               |
| <b>4-variable Combination of Modifiable Factors at Menopause</b> |                                      |               |                           |               |                           |               |
| WTC, alcohol, physical activity, breast feeding <sup>a</sup>     | 27.2                                 | 15.1, 38.5    | 31.3                      | 16.9, 44.5    | 22.5                      | -0.04, 45.9   |
| WTC, alcohol, physical activity, MHT                             | 33.5                                 | 22.5, 43.6    | 39.7                      | 27.0, 51.0    | 26.1                      | 1.0, 48.2     |
| WTC, alcohol, breast feeding <sup>a</sup> , MHT                  | 32.4                                 | 23.1, 41.0    | 37.9                      | 27.0, 47.7    | 26.9                      | 1.1, 49.3     |
| WTC, physical activity, breast feeding <sup>a</sup> , MHT        | 30.4                                 | 21.3, 39.1    | 35.1                      | 24.4, 45.1    | 20.1                      | -0.1, 38.8    |
| Alcohol, physical activity, breast feeding <sup>a</sup> , MHT    | 19.4                                 | 9.7, 28.8     | 20.6                      | 8.7, 31.9     | 19.2                      | 0.1, 36.9     |
| <b>3-variable Combination of Modifiable Factors at Menopause</b> |                                      |               |                           |               |                           |               |
| WTC, alcohol, physical activity                                  | 26.0                                 | 14.8, 36.6    | 31.3                      | 18.1, 43.5    | 20.6                      | -0.03, 42.3   |
| WTC, alcohol, breast feeding <sup>a</sup>                        | 24.8                                 | 15.5, 33.6    | 29.3                      | 18.2, 39.7    | 21.4                      | -0.03, 43.5   |
| WTC, physical activity, breast feeding <sup>a</sup>              | 22.6                                 | 13.5, 31.3    | 26.1                      | 15.1, 36.5    | 14.1                      | -4.1, 31.4    |
| Alcohol, physical activity, breast feeding <sup>a</sup>          | 10.4                                 | 0.9, 19.8     | 9.7                       | -2.2, 21.4    | 13.1                      | -3.8, 29.3    |
| WTC, alcohol, MHT                                                | 31.2                                 | 22.9, 39.2    | 37.9                      | 28.2, 46.8    | 25.1                      | 1.7, 45.9     |

|                                                                  |      |               |      |               |      |               |
|------------------------------------------------------------------|------|---------------|------|---------------|------|---------------|
| WTC, physical activity, MHT                                      | 29.3 | 21.1,<br>37.1 | 35.1 | 25.6,<br>44.0 | 18.2 | 0.8,<br>34.5  |
| WTC, breast feeding <sup>a</sup> , MHT                           | 28.1 | 21.7,<br>34.3 | 33.2 | 25.5,<br>40.5 | 19.0 | 0.8,<br>36.0  |
| Alcohol, breast feeding <sup>a</sup> , MHT                       | 16.7 | 10.2,<br>23.0 | 18.2 | 10.3,<br>25.9 | 18.1 | 1.1,<br>34.0  |
| Alcohol, MHT, physical activity                                  | 18.1 | 9.1,<br>26.8  | 20.6 | 9.8,<br>31.0  | 17.2 | 1.1,<br>32.4  |
| Breast feeding <sup>a</sup> , MHT, physical activity             | 14.5 | 7.2,<br>21.6  | 14.8 | 5.9,<br>23.4  | 10.5 | -0.6,<br>21.3 |
| <b>2-variable Combination of Modifiable Factors at Menopause</b> |      |               |      |               |      |               |
| Alcohol, physical activity                                       | 9.0  | 0.5,<br>17.3  | 9.7  | -0.7,<br>19.9 | 11.0 | -2.9,<br>24.5 |
| WTC, alcohol                                                     | 23.5 | 15.2,<br>31.6 | 29.3 | 19.4,<br>38.6 | 19.5 | -2.8,<br>39.9 |
| Alcohol, breast feeding <sup>a</sup>                             | 7.4  | 1.5,<br>13.3  | 7.0  | -0.4,<br>14.3 | 11.9 | -2.8,<br>26.1 |
| Physical activity, breast feeding <sup>a</sup>                   | 4.9  | -0.7,<br>10.4 | 2.9  | -4.0,<br>9.9  | 3.7  | -3.6,<br>11.0 |
| WTC, physical activity                                           | 21.3 | 13.2,<br>29.2 | 26.1 | 16.4,<br>35.3 | 12.0 | -3.5,<br>26.9 |
| WTC, breast feeding <sup>a</sup>                                 | 28.7 | 18.7,<br>38.2 | 23.9 | 16.4,<br>31.1 | 12.9 | -3.3,<br>28.4 |
| MHT, physical activity                                           | 13.1 | 7.4,<br>18.6  | 14.8 | 8.0,<br>21.4  | 8.3  | 1.2,<br>15.3  |
| MHT, WTC                                                         | 26.9 | 20.4,<br>33.3 | 33.2 | 25.3,<br>40.6 | 17.0 | -1.4,<br>34.3 |
| MHT, alcohol                                                     | 15.3 | 9.4,<br>21.1  | 18.2 | 11.0,<br>25.2 | 16.1 | 0.4,<br>31.0  |

<sup>a</sup> Nulliparous women are considered to have no breast feeding

Abbreviations: WTC: Weight change since age 18; MHT: Menopausal hormone therapy

Web Table 3. Estimated Incident Rates for Combinations of Risk Factors in Postmenopausal Women, Nurses' Health Study 1980-2010

|                                                                                                                                                                                                                                                                              | <b><u>Incidence Rates<sup>a</sup></u></b> | <b><u>95% CI</u></b>  |
|------------------------------------------------------------------------------------------------------------------------------------------------------------------------------------------------------------------------------------------------------------------------------|-------------------------------------------|-----------------------|
|                                                                                                                                                                                                                                                                              | 8,421 <sup>b</sup>                        |                       |
|                                                                                                                                                                                                                                                                              | 2,424,778 <sup>c</sup>                    |                       |
| Overall incidence rate for all variables set to observed mean                                                                                                                                                                                                                | 324                                       | 315, 333 <sup>d</sup> |
| <b>Full Models—Where the risk factors are set to lowest risk category</b>                                                                                                                                                                                                    |                                           |                       |
| Full Model : age, age at menarche, age at first birth/parity, age at menopause, height, family history, BMI at age 18, history of benign breast diseases, weight change since age 18, alcohol consumption, physical activity, breast feeding, and menopausal hormone therapy | 41                                        | 30, 56                |
| Full model without age                                                                                                                                                                                                                                                       | 108                                       | 96, 122               |
| <b>5-way Combination of Factors Modifiable at Menopause</b>                                                                                                                                                                                                                  |                                           |                       |
| WTC, alcohol, physical activity, breast feeding and menopausal hormone therapy (MHT)                                                                                                                                                                                         | 210                                       | 191, 230              |
| <b>4-way Combination of Factors Modifiable at Menopause</b>                                                                                                                                                                                                                  |                                           |                       |
| WTC, alcohol, physical activity, breast feeding                                                                                                                                                                                                                              | 234                                       | 214, 255              |
| WTC, alcohol, physical activity, MHT                                                                                                                                                                                                                                         | 213                                       | 195, 233              |
| WTC, alcohol, breast feeding, MHT                                                                                                                                                                                                                                            | 217                                       | 200, 236              |
| WTC, physical activity, breast feeding, MHT                                                                                                                                                                                                                                  | 223                                       | 206, 242              |
| Alcohol, physical activity, breast feeding, MHT                                                                                                                                                                                                                              | 259                                       | 241, 278              |
| <b>3-way Combination of Factors Modifiable at Menopause</b>                                                                                                                                                                                                                  |                                           |                       |
| WTC, alcohol, physical activity                                                                                                                                                                                                                                              | 238                                       | 218, 259              |
| WTC, alcohol, breast feeding                                                                                                                                                                                                                                                 | 242                                       | 224, 262              |
| WTC, physical activity, breast feeding                                                                                                                                                                                                                                       | 249                                       | 231, 269              |
| Alcohol, physical activity, breast feeding                                                                                                                                                                                                                                   | 289                                       | 270, 309              |

|                                                             |     |          |
|-------------------------------------------------------------|-----|----------|
| WTC, alcohol, MHT                                           | 221 | 204, 239 |
| WTC, physical activity, MHT                                 | 227 | 210, 245 |
| WTC, breast feeding, MHT                                    | 231 | 216, 248 |
| Alcohol, breast feeding, MHT                                | 268 | 253, 284 |
| Alcohol, MHT, physical activity                             | 263 | 246, 282 |
| Breast feeding, MHT, physical activity                      | 276 | 261, 292 |
| <b>2-way Combination of Factors Modifiable at Menopause</b> |     |          |
| Alcohol, physical activity                                  | 294 | 275, 314 |
| WTC, alcohol                                                | 246 | 228, 266 |
| Alcohol, breast feeding                                     | 299 | 283, 316 |
| Physical activity, breast feeding                           | 308 | 292, 324 |
| WTC, physical activity                                      | 253 | 235, 273 |
| WTC, breast feeding                                         | 258 | 241, 276 |
| MHT, physical activity                                      | 281 | 266, 296 |
| MHT, WTC                                                    | 235 | 220, 252 |
| MHT, alcohol                                                | 273 | 259, 288 |
| <b>Individual Factors Not Modifiable at Menopause</b>       |     |          |
| Age                                                         | 112 | 91, 165  |
| Age at Menarche                                             | 297 | 282, 313 |
| BMI at age 18                                               | 290 | 274, 306 |
| Height >=64"                                                | 304 | 292, 317 |
| Age at first birth/parity                                   | 292 | 282, 303 |
| BBD                                                         | 282 | 272, 292 |
| Family history of breast cancer                             | 308 | 299, 317 |
| Age at menopause                                            | 292 | 280, 305 |
| <b>Individual Factors Modifiable at Menopause</b>           |     |          |

|                            |     |          |
|----------------------------|-----|----------|
| Breast feeding             | 319 | 308, 330 |
| Weight change since age 18 | 262 | 246, 280 |
| MHT                        | 291 | 281, 301 |
| Alcohol                    | 304 | 289, 320 |
| Physical activity          | 313 | 298, 328 |

<sup>a</sup> per 100,000 person years

<sup>b</sup> Number of cases

<sup>c</sup> Number of person years

<sup>d</sup> Incidence with all variables set to observed mean

Abbreviations: WTC: Weight change since age 18; BBD: Benign breast disease; MHT: Menopausal hormone therapy
